# Supplementary material
Source: publisher site journal article supplement (https://www.dovepress.com/article/595836)
Supplement: Supplementary file 1 [file 595836%20Revised%20%2509Supplementary%20Material.docx]

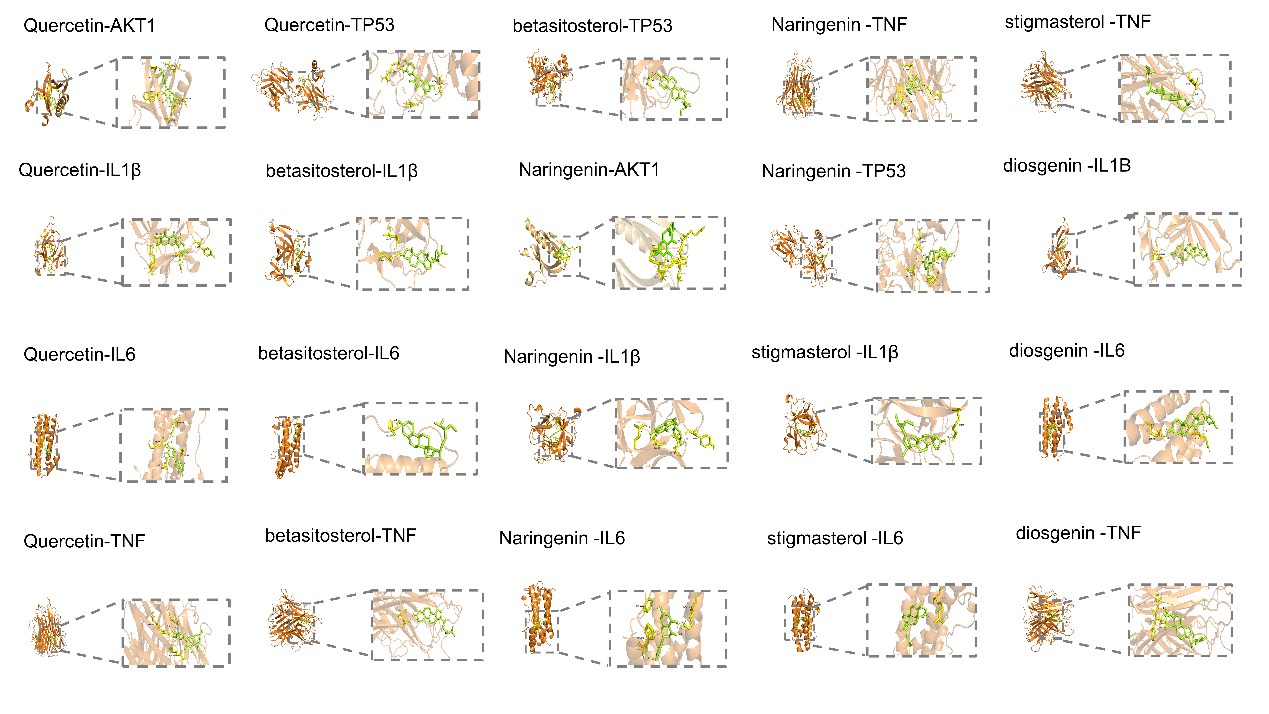


**Supplementary Figure 1. The other 20 molecular docking data.**

| **MOLID** | **Molecule Name** | **MV** | **AlogP** | **Hdon** | **Hacc** | **OB%** | **Caco-2** | **BBB** | **DL** | **FASA-** | **HL** |
| --- | --- | --- | --- | --- | --- | --- | --- | --- | --- | --- | --- |
| MOL013117 | 4,7-Dihydroxy-5-methoxyl-6-methyl-8-formyl-flavan | 314.36 | 2.69 | 2 | 5 | 37.03 | 0.48 | -0.13 | 0.28 | 0.3 | 2.9 |
| MOL013118 | Neoastilbin | 450.43 | 0.63 | 7 | 11 | 40.54 | -1.07 | -1.57 | 0.74 | 0.34 | 17.65 |
| MOL013119 | Enhydrin | 464.51 | 1.37 | 0 | 10 | 40.56 | -0.36 | -0.82 | 0.74 | 0.36 | 5.63 |
| MOL013129 | (2R,3R)-2-(3,5-dihydroxyphenyl)-3,5,7-trihydroxychroman-4-one | 304.27 | 1.49 | 5 | 7 | 63.17 | -0.34 | -0.92 | 0.27 | 0.39 | 15.14 |
| MOL001736 | (-)-taxifolin | 304.27 | 1.49 | 5 | 7 | 60.51 | -0.24 | -1.02 | 0.27 | 0.41 | 14.37 |
| MOL000358 | beta-sitosterol | 414.79 | 8.08 | 1 | 1 | 36.91 | 1.32 | 0.99 | 0.75 | 0.23 | 5.36 |
| MOL000359 | sitosterol | 414.79 | 8.08 | 1 | 1 | 36.91 | 1.32 | 0.87 | 0.75 | 0.22 | 5.37 |
| MOL004328 | naringenin | 272.27 | 2.3 | 3 | 5 | 59.29 | 0.28 | -0.37 | 0.21 | 0.4 | 16.98 |
| MOL000449 | Stigmasterol | 412.77 | 7.64 | 1 | 1 | 43.83 | 1.44 | 1 | 0.76 | 0.22 | 5.57 |
| MOL004567 | isoengelitin | 434.43 | 0.89 | 6 | 10 | 34.56 | -0.91 | -1.39 | 0.7 | 0.35 | 15.58 |
| MOL004575 | astilbin | 450.43 | 0.63 | 7 | 11 | 36.46 | -1.29 | -1.85 | 0.74 | 0.37 | 15.58 |
| MOL004576 | taxifolin | 304.27 | 1.49 | 5 | 7 | 57.84 | -0.23 | -0.8 | 0.27 | 0.39 | 14.41 |
| MOL004580 | cis-Dihydroquercetin | 304.27 | 1.49 | 5 | 7 | 66.44 | -0.34 | -1.11 | 0.27 | 0.4 | 14.51 |
| MOL000546 | diosgenin | 414.69 | 4.63 | 1 | 3 | 80.88 | 0.82 | 0.27 | 0.81 | 0.19 | 4.14 |
| MOL000098 | quercetin | 302.25 | 1.5 | 5 | 7 | 46.43 | 0.05 | -0.77 | 0.28 | 0.38 | 14.4 |

**Supplementary Table 1. Details of 15 ingredients in *Smilax glabra* Roxb. from TCMSP**

**Supplementary Table 2. 191 Gene Targets after removing the duplicates**

| PTGS1 | SCN5A | PTGS2 | PDE3A | PIK3CG | CALM | CA II | NR3C2 | PGR | NCOA2 |
| --- | --- | --- | --- | --- | --- | --- | --- | --- | --- |
| KCNH2 | DRD1 | CHRM3 | CHRM1 | GABRA2 | CHRM4 | HTR2A | GABRA5 | ADRA1A | GABRA3 |
| CHRM2 | ADRA1B | ADRB2 | CHRNA2 | SLC6A4 | OPRM1 | GABRA1 | CHRNA7 | BCL2 | BAX |
| CASP9 | JUN | CASP3 | CASP8 | PRKCA | TGFB1 | PON1 | MAP2 | ESR1 | RELA |
| AKT1 | MAPK3 | MAPK1 | FASN | LDLR | CAT | PPARG | MTTP | APOB | PLB1 |
| HMGCR | GSTP1 | PPARA | SREBF1 | GSR | ABCC1 | ADIPOQ | SOAT2 | AKR1C1 | GOT1 |
| ABAT | CES1 | SOAT1 | ADH1C | IGHG1 | RXRA | NCOA1 | ADRA2A | SLC6A2 | SLC6A3 |
| AKR1B1 | PLAU | LTA4H | MAOB | CTRB1 | ADRB1 | IL10 | TNF | IFNG | ICAM1 |
| DGAT2 | VEGFA | CDKN1A | TP53 | HIF1A | NR1I2 | PLA2G4A | MTOR | AR | MMP3 |
| F7 | NOS3 | ACHE | EGFR | CCND1 | BCL2L1 | FOS | EIF6 | MMP2 | MMP9 |
| EGF | RB1 | IL6 | AHSA1 | ELK1 | NFKBIA | POR | ODC1 | XDH | TOP1 |
| RAF1 | MMP1 | STAT1 | RUNX1T1 | HSPA5 | ERBB2 | ACACA | HMOX1 | CYP3A4 | CYP1A2 |
| CAV1 | MYC | F3 | GJA1 | CYP1A1 | IL1B | CCL2 | SELE | VCAM1 | PTGER3 |
| CXCL8 | PRKCB | BIRC5 | DUOX2 | HSPB1 | SULT1E1 | MGAM | IL2 | CYP1B1 | CCNB1 |
| PLAT | THBD | SERPINE1 | COL1A1 | ALOX5 | PTEN | IL1A | MPO | TOP2A | NCF1 |
| ABCG2 | HAS2 | NFE2L2 | NQO1 | PARP1 | AHR | PSMD3 | SLC2A4 | COL3A1 | CXCL11 |
| CXCL2 | DCAF5 | NR1I3 | CHEK2 | INSR | CLDN4 | PPARD | HSF1 | CRP | CXCL10 |
| CHUK | SPP1 | RUNX2 | RASSF1 | E2F1 | E2F2 | ACP3 | CTSD | IGFBP3 | IGF2 |
| CD40LG | IRF1 | ERBB3 | DIO1 | PCOLCE | NPEPPS | HK2 | NKX3-1 | RASA1 | GSTM1 |
| GSTM2 |  |  |  |  |  |  |  |  |  |
